# Supplementary material for: Redox sensing of anions in pure aqueous environment by ferrocene-containing 4,4′-bipyridinium-based receptors and polymer films
Source: Royal Society of Chemistry journal article supplement (doi:10.1039/b314236a), 2004-01-01
Supplement: b314236a.pdf [file b314236a.pdf]

### Electronic supplementary information

#### Electrochemical behaviour and characterization of monomer **3** and *poly-3*

The cyclic voltammetry curves for **3** in CH<sub>3</sub>CN (Fig. S1) exhibit three reversible and monoelectronic waves corresponding to the V<sup>2+/+</sup>, V<sup>•+/0</sup> and Fc<sup>0/+</sup> redox couples at  $E_{1/2} = -1.16$ ,  $-0.75$  and  $0.27$  V vs Ag/Ag<sup>+</sup>, respectively. In addition an anodic peak is seen at  $E_{pa} = 1.07$  V, corresponding to the irreversible oxidation of the appended pyrrole group leading to polypyrrole formation.

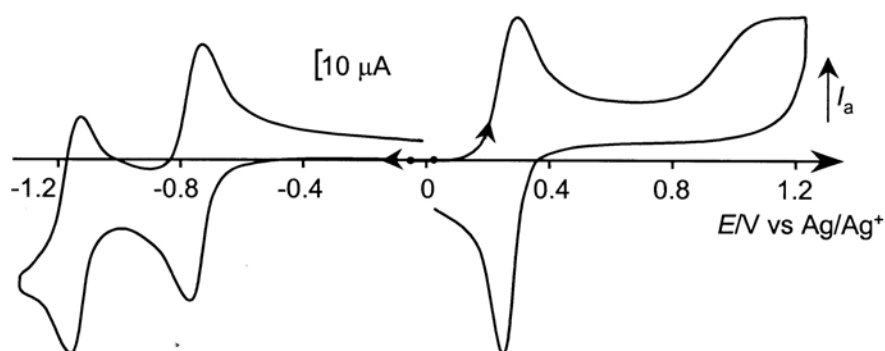

**Fig. S1.** CV curve recorded at a carbon disc electrode (3 mm diameter) in a millimolar solution of **3** in CH<sub>3</sub>CN + 0.1 M TBAP; scan rate = 0.1 V s<sup>-1</sup>.

The modified electrodes synthesized by controlled potential electrolysis at +0.9 V in millimolar solutions of **3** display the stable electrochemical response for immobilized *poly-3* films (see figure 2). However, as for other ferrocene-containing polypyrrole homopolymers,<sup>1-3</sup> no clear redox peaks system attributable to the electroactivity of the polypyrrole matrix could be detected on the CV curves for the modified electrodes. Obviously the electrochemical response of the polypyrrole chain, which is expected to be seen around 0.4 V,<sup>4</sup> may be hidden under that of the ferrocene moieties. Furthermore, under our experimental conditions the electroactivity of the polypyrrole matrix could partially be destroyed following some overoxidation.

The apparent surface concentration of **3** in polymer films (denoted  $\Gamma$ ) was determined from the integrated current recorded under the ferrocene oxidation wave.

- 1 N. C. Fould and C. R. Lowe, *Anal. Chem.*, 1988, **60**, 2473.
- 2 J. G. Eaves, R. Mirzaei, D. Parker and H. S. Munro, *J. Chem. Soc. Perkin Trans II*, 1989, 373.
- 3 A. Ion, I. Ion, A. Popescu, M. Ungureanu, J.-C. Moutet and E. Saint-Aman, *Adv. Mater.*, 1997, **9**, 711.
- 4 A. Deronzier and J.-C. Moutet, *Acc. Chem. Res.*, 1989, **22**, 249.
